# Supplementary material for: Masking the Perceived Astringency of Proanthocyanidins in Beverages Using Oxidized Starch Hydrogel Microencapsulation
Source: MDPI journal article supplement (doi:10.3390/foods9060756), 2020-06-08
Supplement: s1 [file s1]

## Supplementary Materials

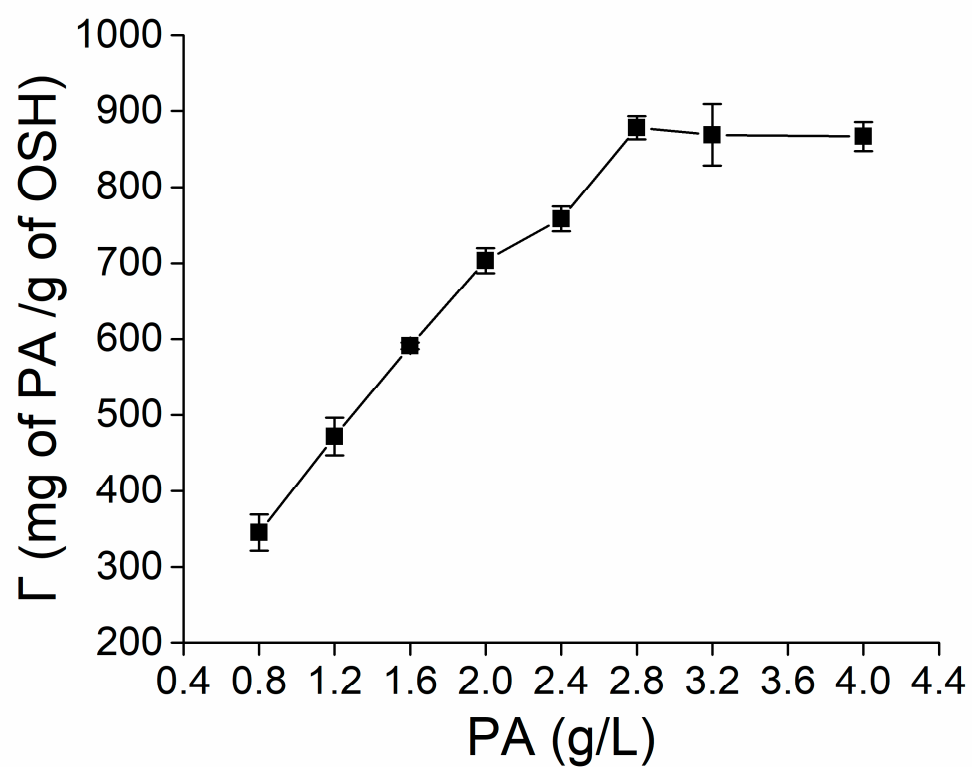

Figure S1. The proanthocyanidin (PA) uptake capacity ( $\Gamma$ , mg/g) of the oxidized starch hydrogel (OSH) as a function of the PA concentration. The OSH concentration is 1 g/L for all samples.

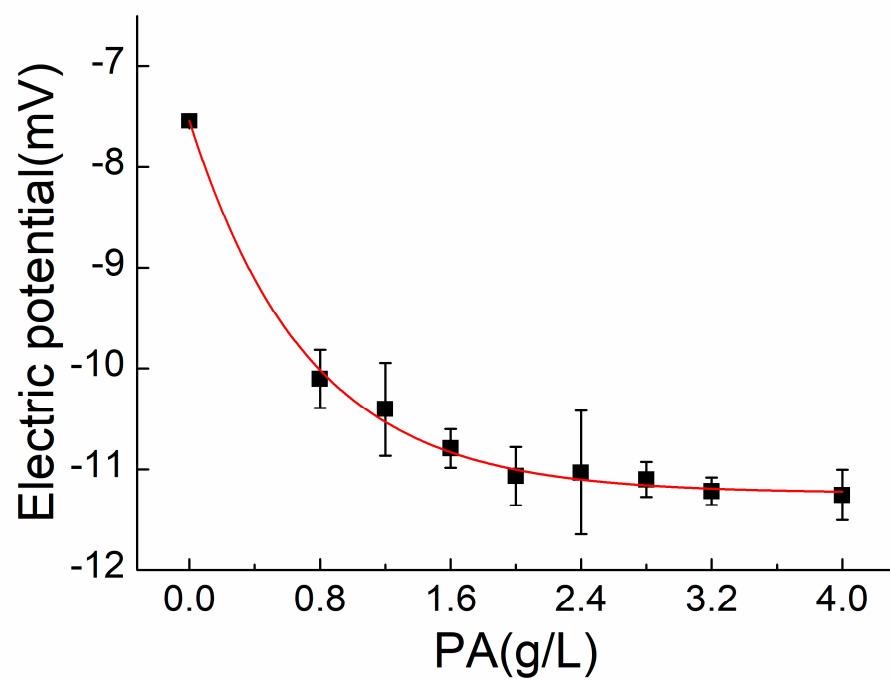

Figure S2. The  $\zeta$ -potential of the PA-OSH complex as a function of the PA concentration. The OSH concentration is 1 g/L for all samples.
